# Supplementary material
Source: PubMed Central journal article supplement (PMC1356309)
Supplement: 7600869s1.pdf [file 7600869s1.pdf]

**Supplementary Table 1. Summary of kinetic data**

| Proteins       | $K_M$<br>(mM AMP) | $V_{max}$<br>(nmolAMP/min*mg) |
|----------------|-------------------|-------------------------------|
| PARN WT        | 0.01              | 8368.5                        |
| F31A           | 0.05              | 159.7                         |
| I34A           | 0.03              | 416.0                         |
| F115A          | 0.02              | 777.7                         |
| F127A          | 0.01              | 5112.7                        |
| K326A          | 0.08              | 560.64                        |
| PARN (175-245) | 0.16              | 16498.1                       |
| PARNn          | 0.50              | 272.9                         |

Tabulated  $K_M$  and  $V_{max}$  values were measured at least twice.
