# Supplementary material
Source: PubMed Central journal article supplement (PMC1356309)
Supplement: 7600869s3.pdf [file 7600869s3.pdf]

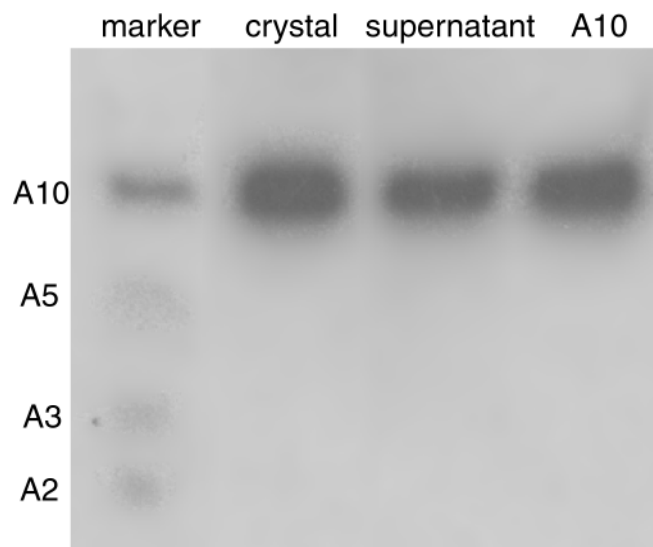

**Supplementary Figure 1. Crystals of the PARNn-RNA complex contain the intact 10-mer poly(A).** Crystallization drops containing the crystals of the PARN-RNA complex were pooled. After centrifugation, both the crystals and supernatant were collected. The harvested crystals were washed three times with the crystallization buffer, and resuspended in nuclease-free water. The nucleotides in crystals and supernatant were purified with phenol-chloroform and ethanol precipitation. The 10-mer oligo(A) dissolved in nuclease-free water was used as control. All the nucleotides were radio-labeled as described in Methods and Materials, and run on 25% denaturing polyacrylamide gel. The mixture of radio-labeled A10, A5, A3 and A2 was used as marker.
