# Supplementary material
Source: PubMed Central journal article supplement (PMC1356309)
Supplement: 7600869s4.pdf [file 7600869s4.pdf]

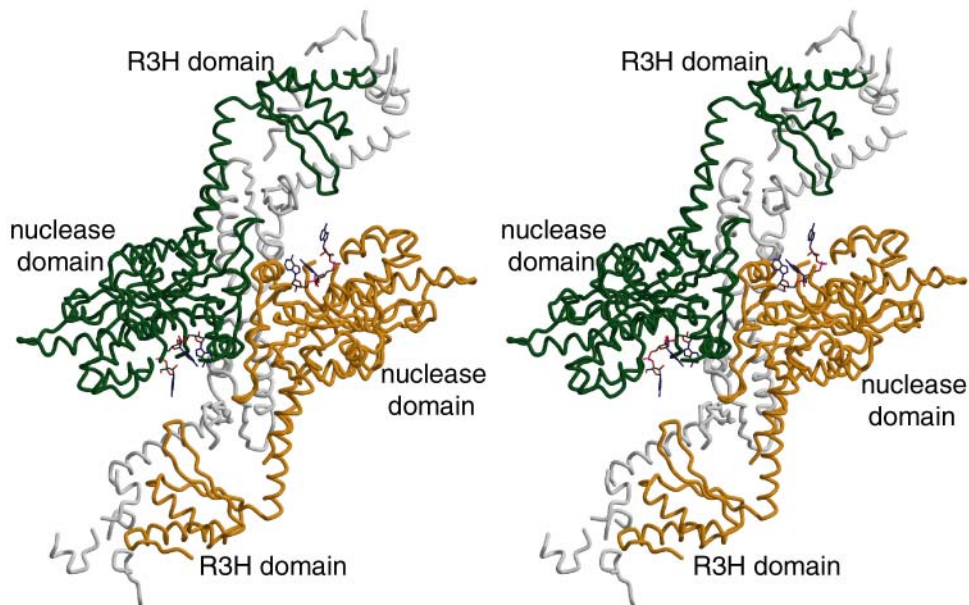

**Supplementary Figure 2. Stereo diagram of native PARNn with the adjacent molecules interacting with the R3H domains.** The two molecules (chain A and chain B) are shown in worm model and highlighted with darkgreen and orange, respectively. For simplicity, only the regions of the adjacent molecules interacting with the R3H domain are shown with light grey color. The orientation of the PARN dimer is as in **Figures 1B and 1C**. The superimposed nucleotides from the PARNn-RNA complex are shown in stick model to indicate the location of the active sites.
