# Supplementary material
Source: PubMed Central journal article supplement (PMC1356309)
Supplement: 7600869s5.pdf [file 7600869s5.pdf]

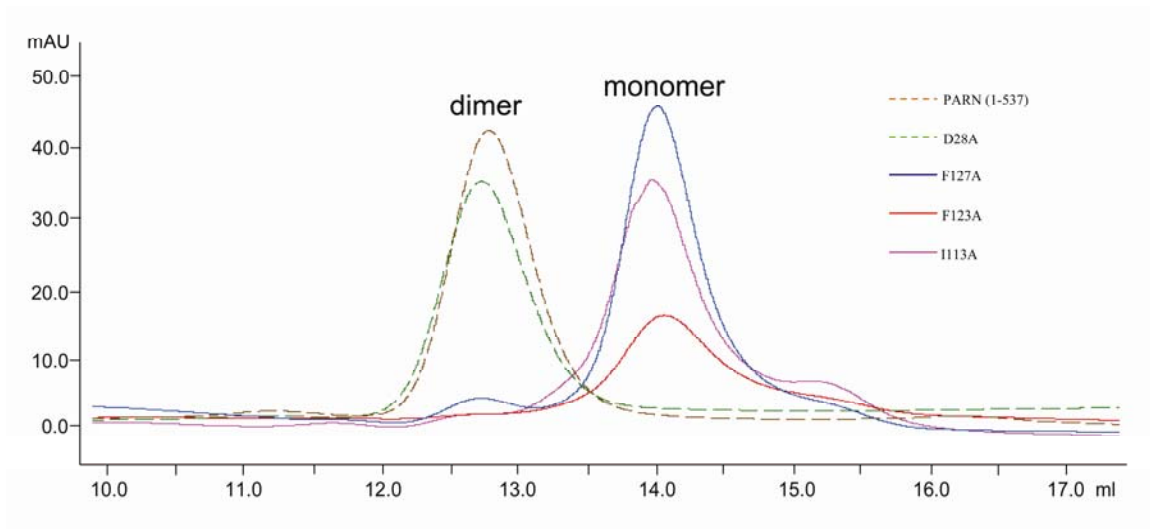

**Supplementary Figure 3. The profiles of analytical gel filtration for the mutant PARN proteins.** Gel filtration was performed with Superdex 200 column using a buffer containing 20mM Tris (pH 8.0), 200mM NaCl, 2mM DTT and 2mM MgCl<sub>2</sub>. The profiles for PARN(1-537), D28A, F127A, F123A and I113A mutants are colored in brown, green, blue, red, and pink, respectively. The positions of the dimeric and monomeric forms of PARN proteins are marked.
